# Supplementary material
Source: Springer Nature journal article supplement (https://www.springermedizin.de/resource/supplementary/12872_2013_672_MOESM1_ESM.pdf/9430540)

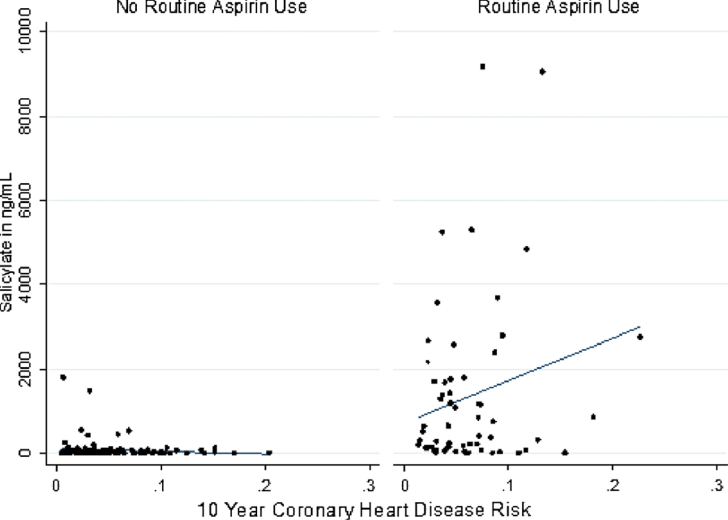

No Use: R-squared=0.01  
P=0.6

Routine Use: R-squared=0.11

Supplement: MOESM1 [file 9430540]
